# Supplementary material for: Patient-derived multicellular tumor spheroids towards optimized treatment for patients with hepatocellular carcinoma
Source: Springer Nature journal article supplement (doi:10.1186/s13046-018-0752-0), 2018-05-25

# Figure S1

**A.**

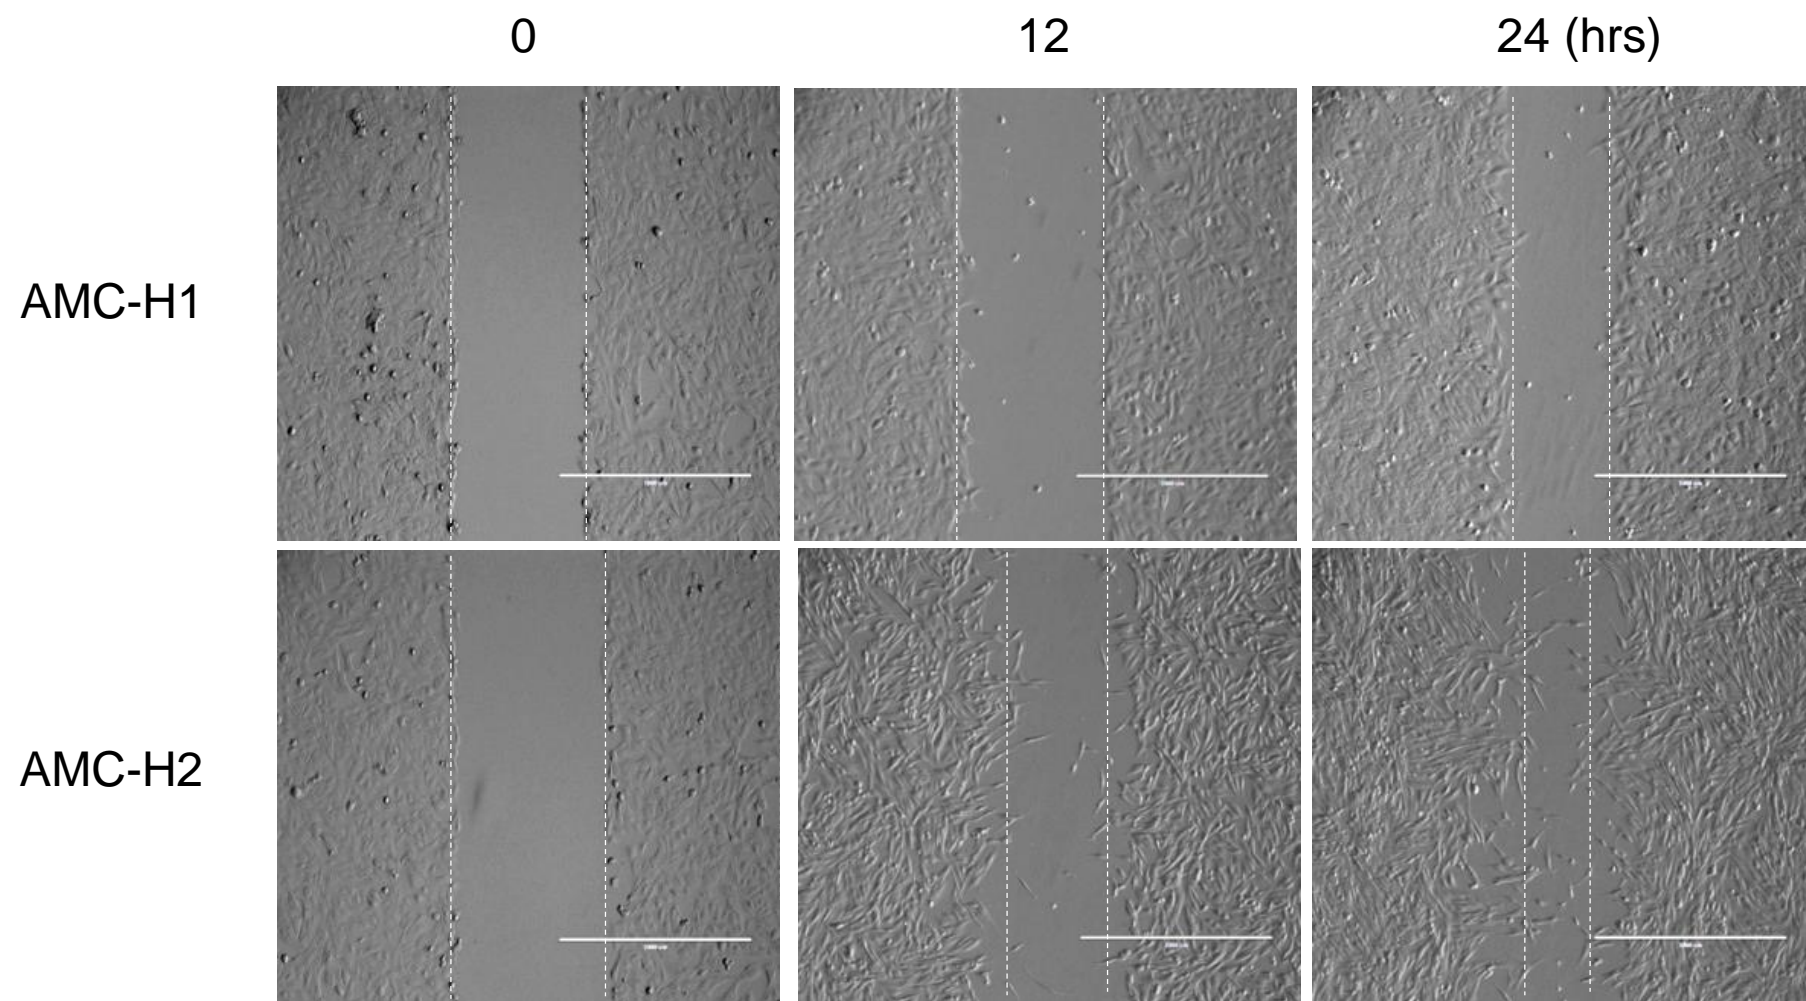

**B.**

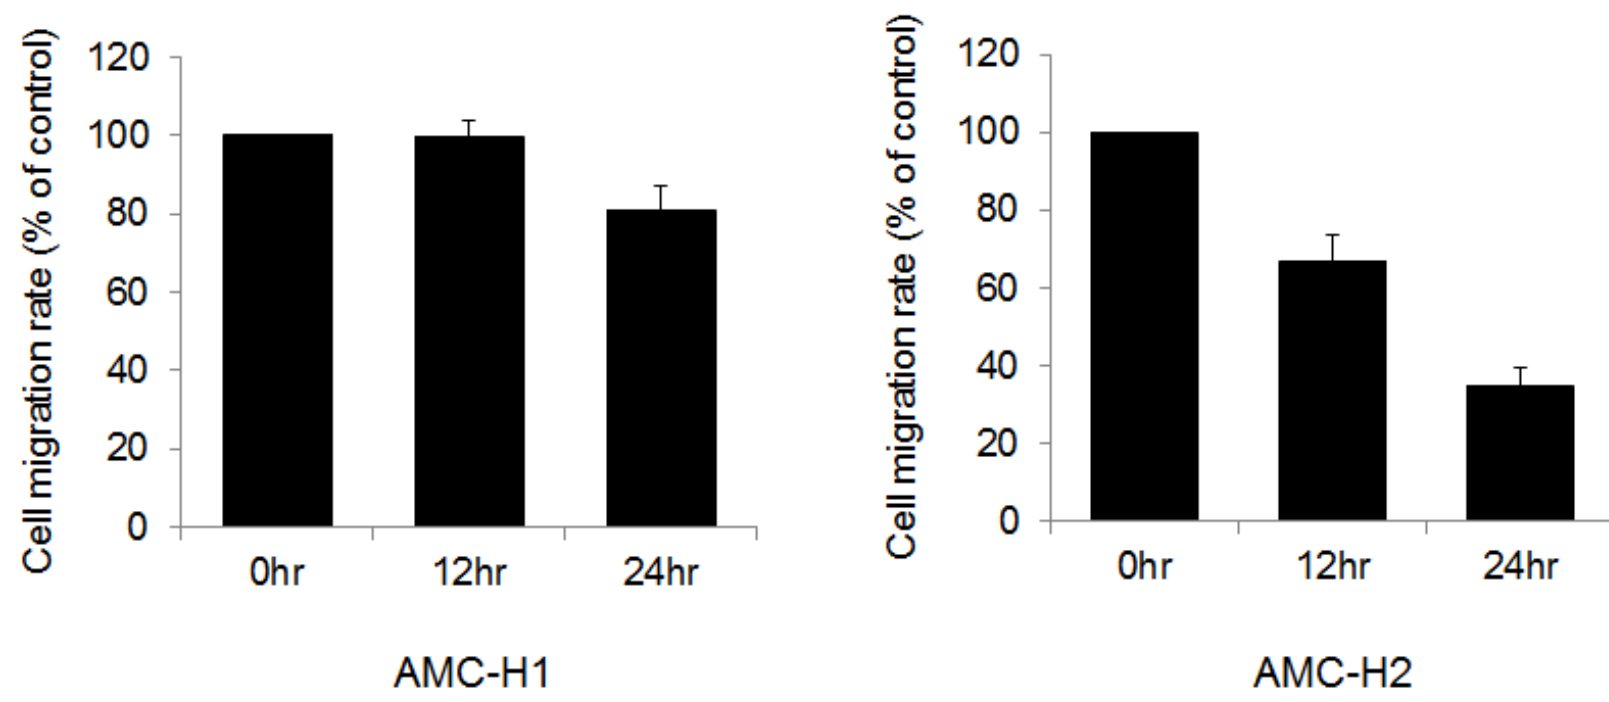

# Figure S2

AMC-H1

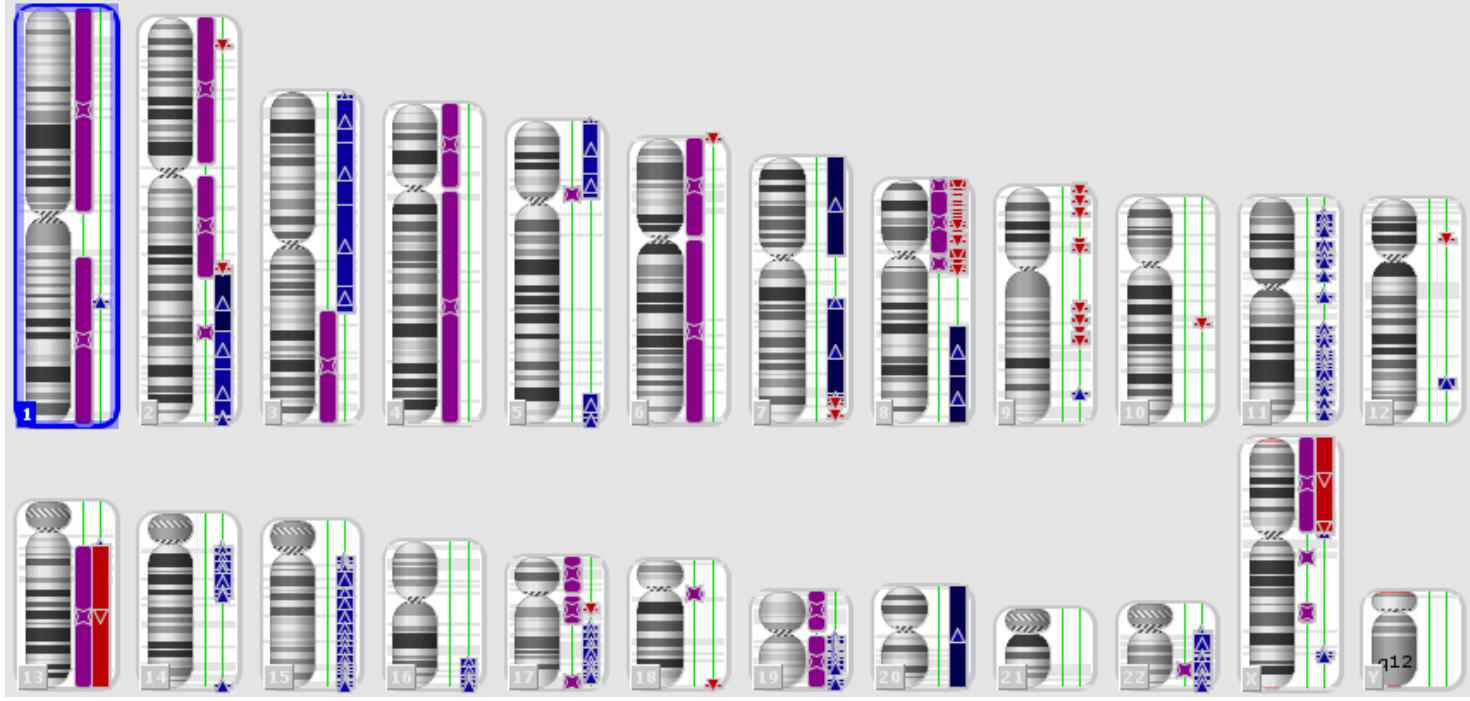

AMC-H2

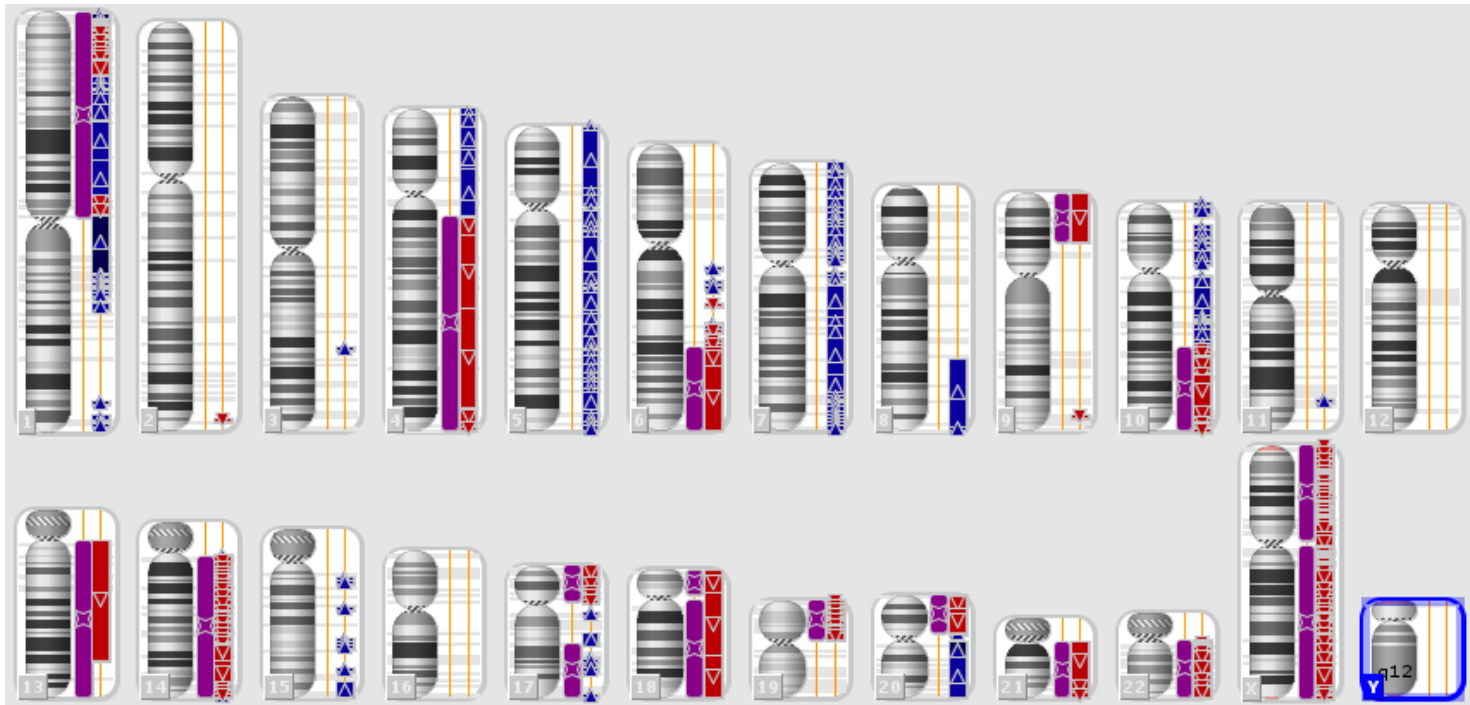

# Figure S3

## A.

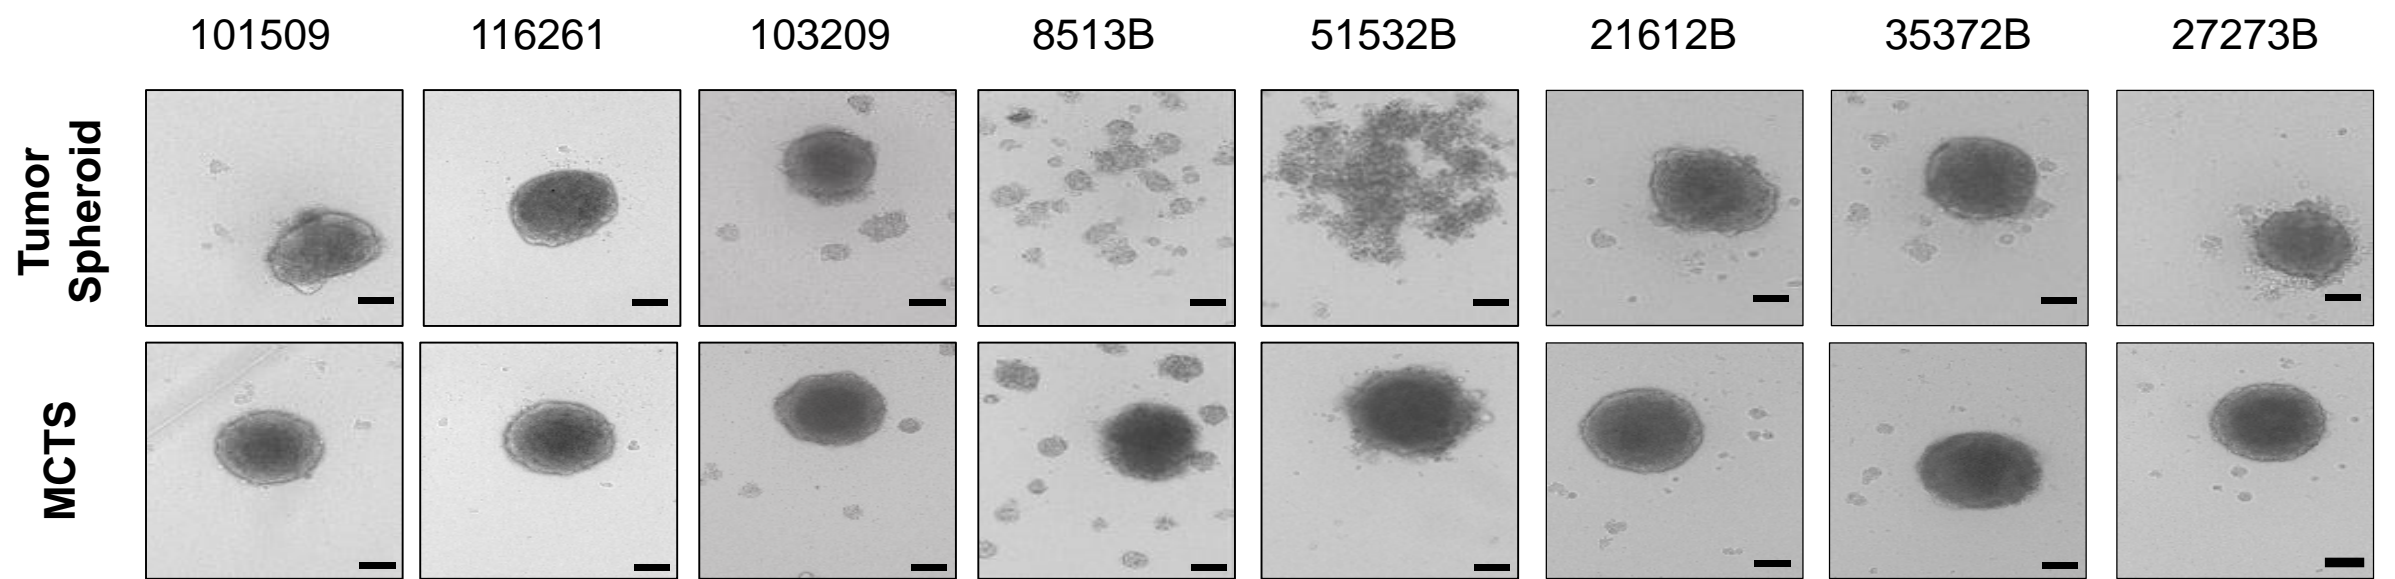

## B.

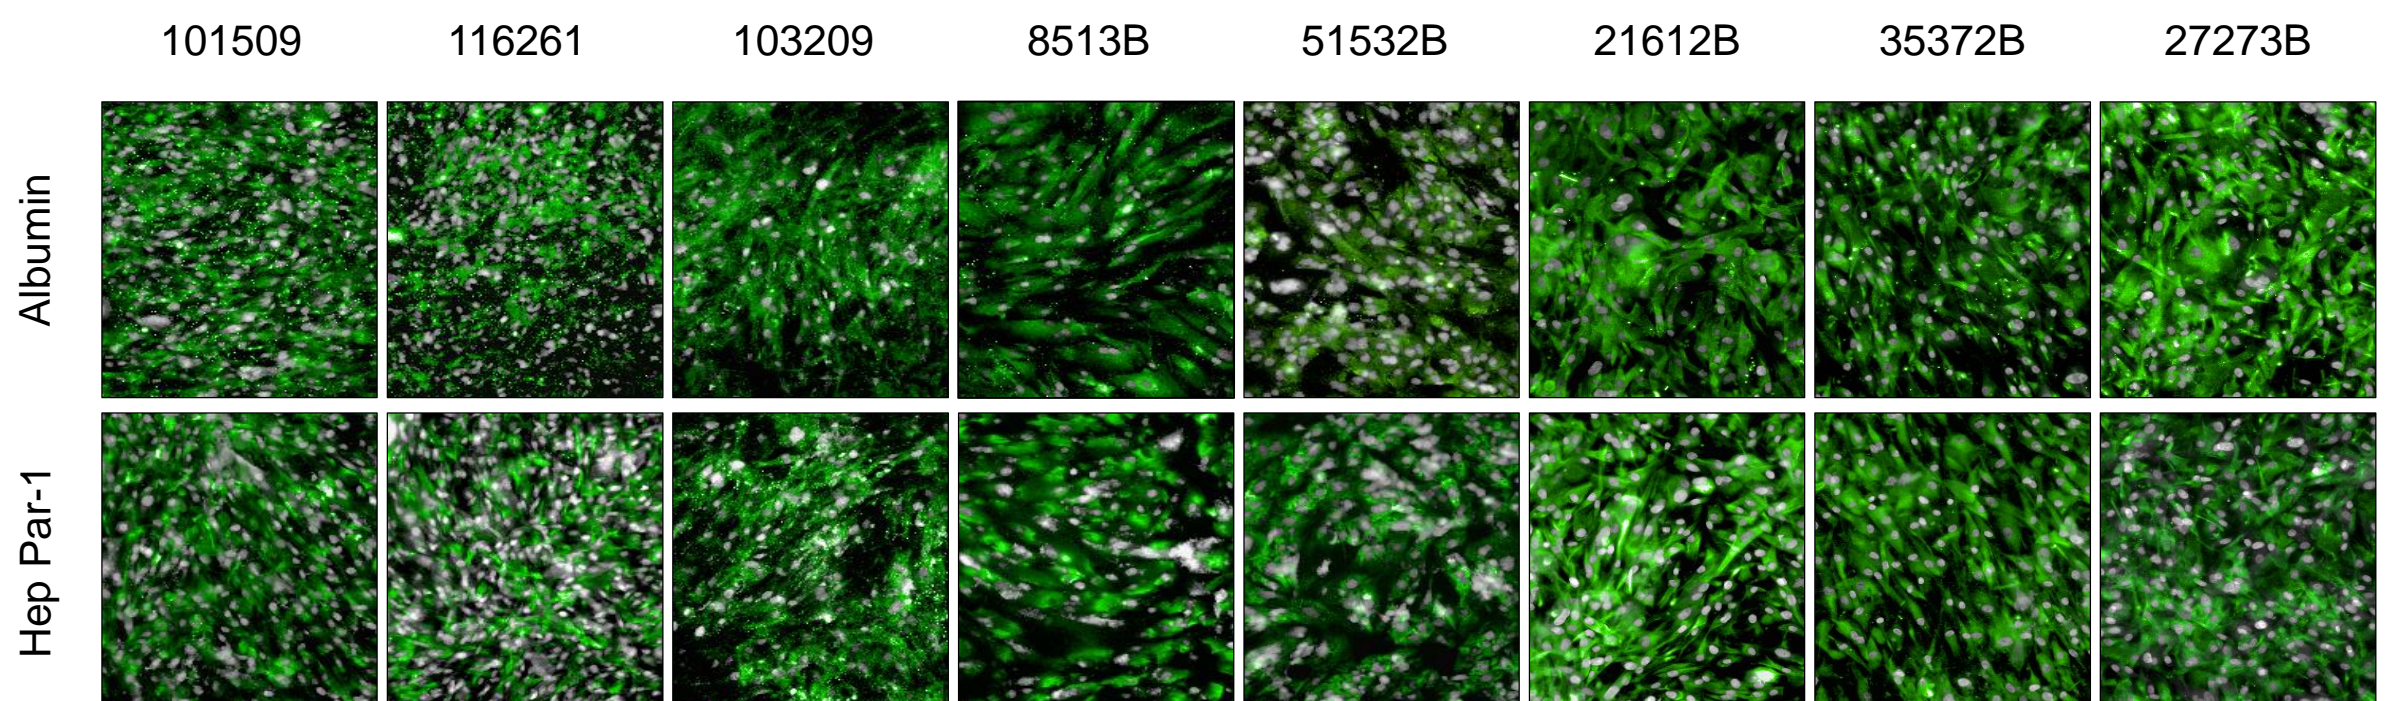

## C.

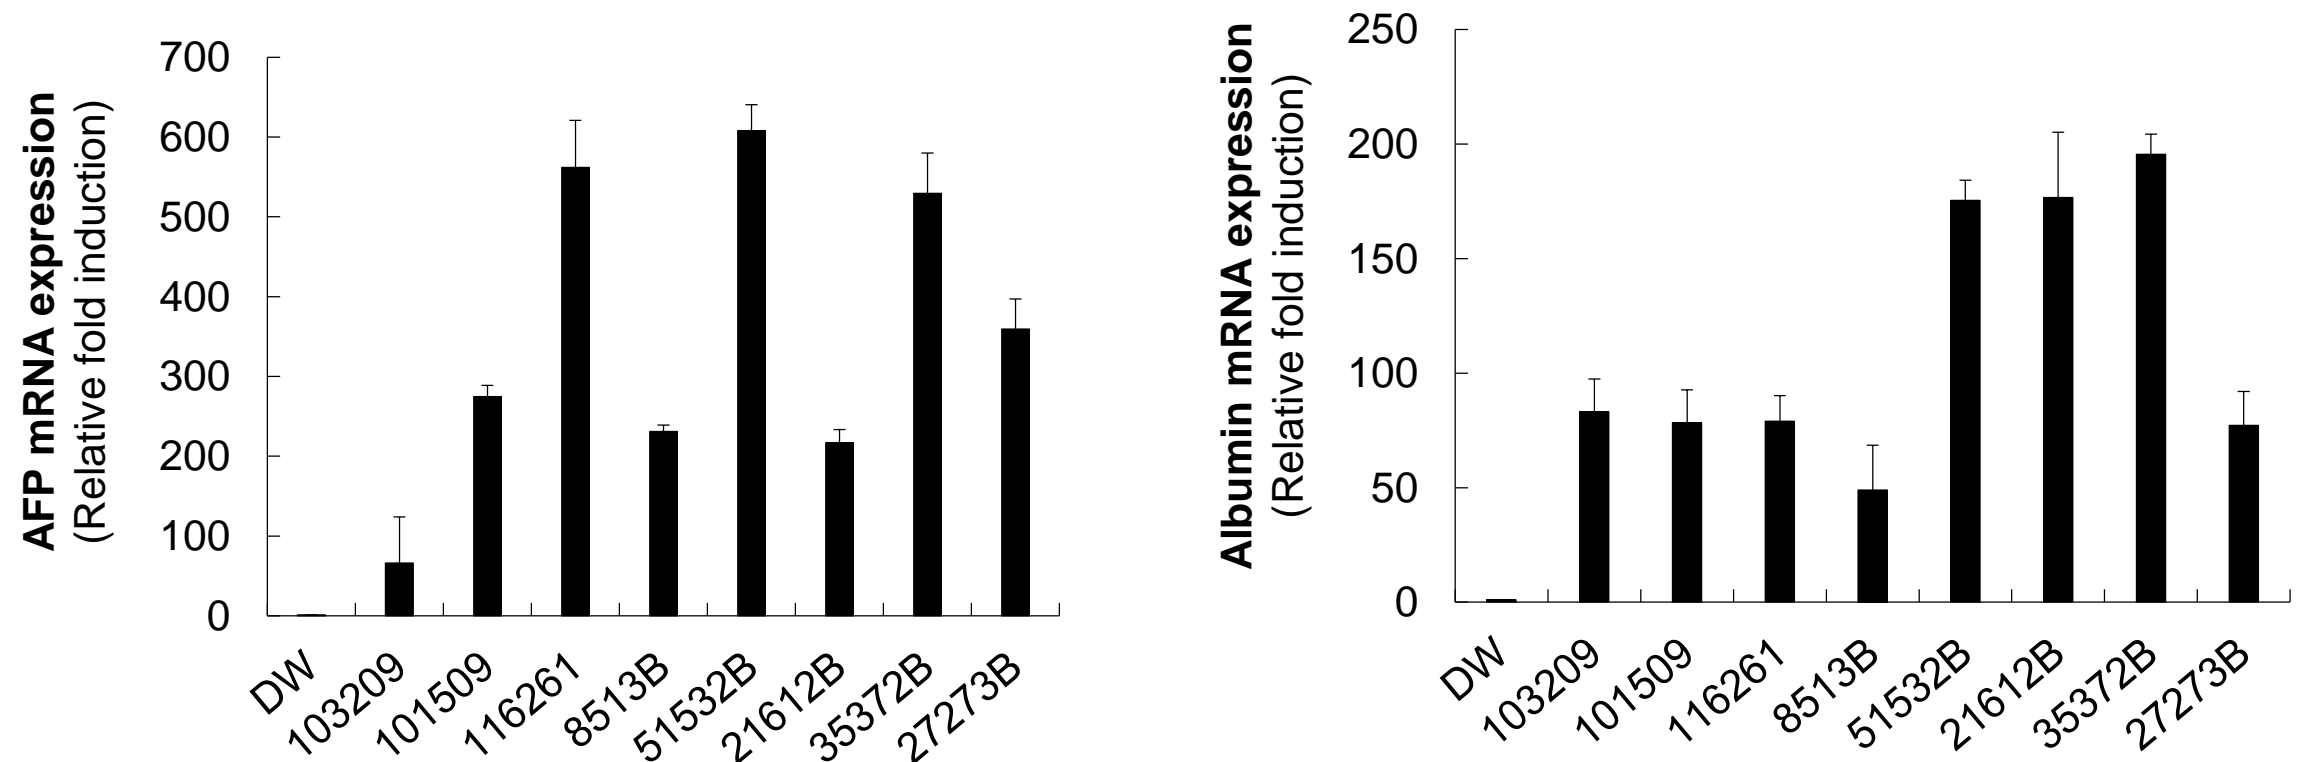

Supplement: MOESM2 [file 15793136]
